# Supplementary material for: Leveraging autocatalytic reactions for chemical domain image classification
Source: PubMed Central journal article supplement (PMC8179570; doi:10.1039/d0sc05860b), 2021-03-03
Supplement: SC-012-D0SC05860B-s001.pdf [file SC-012-D0SC05860B-s001.pdf]

Supplementary Information for  
**Leveraging autocatalytic reactions for  
chemical-domain image classification**

Christopher E. Arcadia<sup>a</sup>, Amanda Dombroski<sup>b</sup>, Kady Oakley<sup>b</sup>, Shui Ling Chen<sup>b</sup>, Hokchhay Tann<sup>a</sup>, Christopher Rose<sup>a</sup>, Eunsuk Kim<sup>b</sup>, Sherief Reda<sup>a</sup>,  
Brenda M. Rubenstein<sup>b</sup>, and Jacob K. Rosenstein<sup>\*a</sup>

March 1, 2021

---

<sup>a</sup>School of Engineering, Brown University, Providence, RI, USA

<sup>b</sup>Department of Chemistry, Brown University, Providence, RI, USA

# Contents

|          |                                         |           |
|----------|-----------------------------------------|-----------|
| <b>1</b> | <b>Code Repository</b>                  | <b>3</b>  |
| <b>2</b> | <b>Image Database</b>                   | <b>3</b>  |
| <b>3</b> | <b>Selected Classes</b>                 | <b>5</b>  |
| <b>4</b> | <b>Classifier Training</b>              | <b>10</b> |
| <b>5</b> | <b>Simulating Many 5-Class Networks</b> | <b>15</b> |
| <b>6</b> | <b>Simulating a 9-Class Network</b>     | <b>20</b> |

# 1 Code Repository

All of the MATLAB methods and scripts used to train and simulate the autocatalysis-based winner-take-all networks can be found in the GitHub repository **AutocatalyticWTA**: <https://github.com/Chris3Arcadia/AutocatalyticWTA>.

# 2 Image Database

The images used in this study are from the CalTech 101 Silhouettes dataset<sup>1</sup>, which itself is based on the CalTech 101 image annotations<sup>2</sup>. The database contains 8,641 binary 256-pixel (16×16) images that are each labeled with one of 101 object classes. The data available for each class is summarized by their averages in Figure S1. Additionally, as a measure of class distinctness, the Euclidean distance between each of the class-averaged images is shown in Figure S2. From both Figures S1 and S2, it is clear that many of the images contain class-specific features, but there are also several classes with significant feature overlap. In particular, large, filled circular objects, such as the soccer ball, stop sign, and yin yang symbol, are nearly indistinguishable.

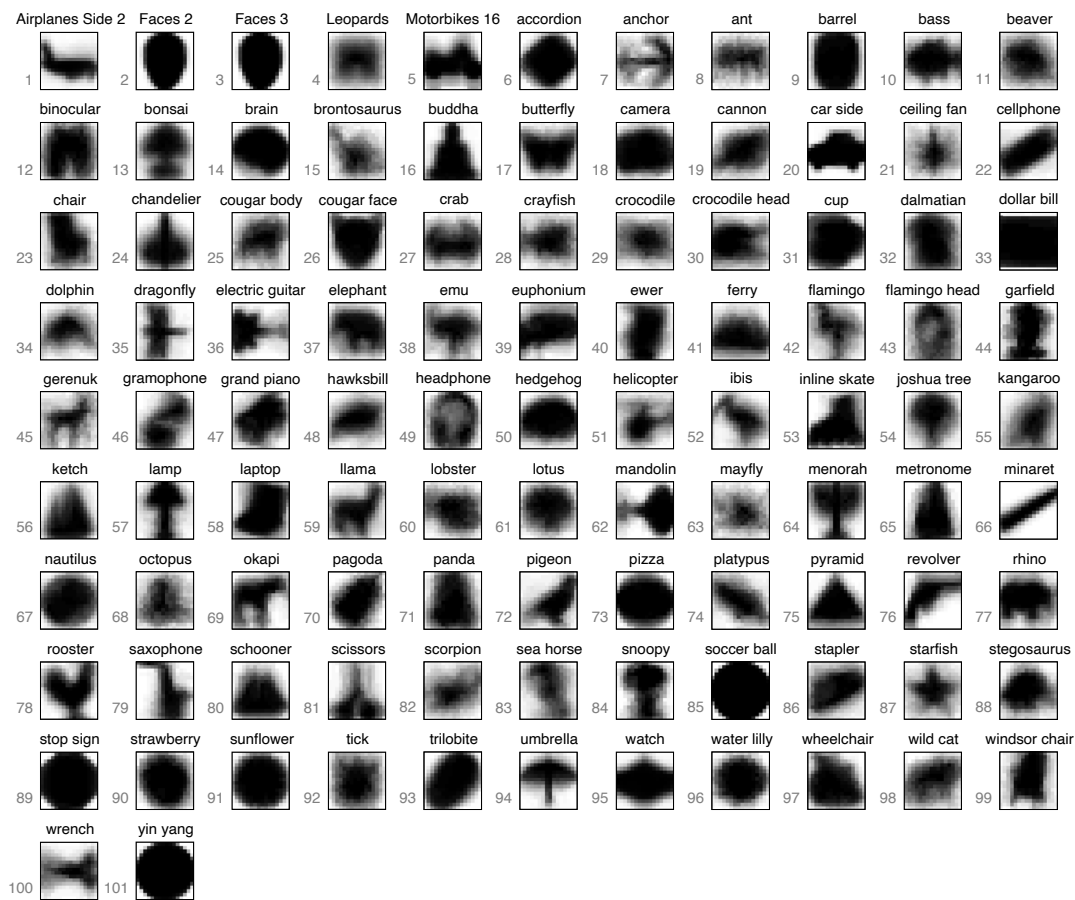

**Figure S1** Averaged image data for each class in the CalTech 101 Silhouettes database<sup>1</sup>. Class indices and names are shown to the left of and above each image, respectively.

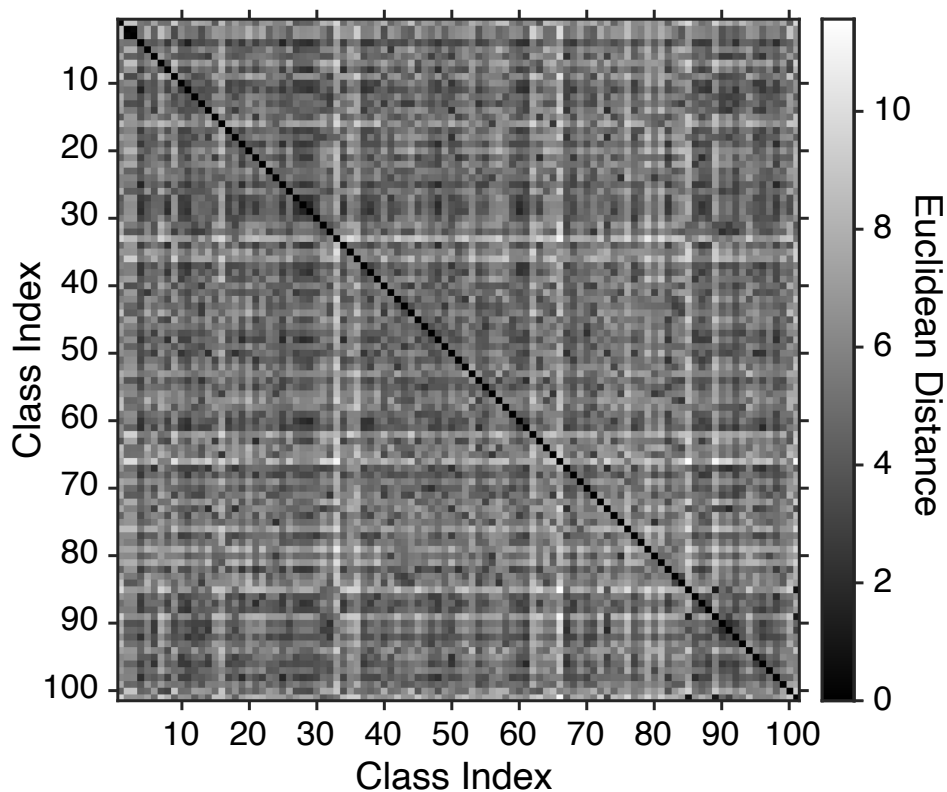

**Figure S2** Euclidean distance between each class-averaged representation of the CalTech 101 Silhouettes<sup>1</sup> (those shown in Figure S1). Similar classes, such as Faces 2 and Faces 3 (indices 2 and 3, respectively), are nearer to each other and thus have intersections that appear darker in color. The distances ( $d$ ) were computed as:  $d(\vec{x}, \vec{y}) = \sqrt{\sum_{i=1}^{256} (y_i - x_i)^2}$ , where  $\vec{x}$  and  $\vec{y}$  are vectors formed by reshaping the  $16 \times 16$ -pixel images being compared.

### 3 Selected Classes

The data used for training and testing our winner-take-all network is a subset of the images available in the CalTech 101 Silhouettes database<sup>1</sup>. Specifically, the dragonfly, ibis, kangaroo, llama, and starfish classes are used in the main text. For completeness, all of the images from these classes are displayed in Figures S3 (dragonfly), S4 (ibis), S5 (kangaroo), S6 (llama), and S7 (starfish). These classes were selected for aesthetic qualities, and to eliminate the large solid objects which would represent a much more difficult classification task.

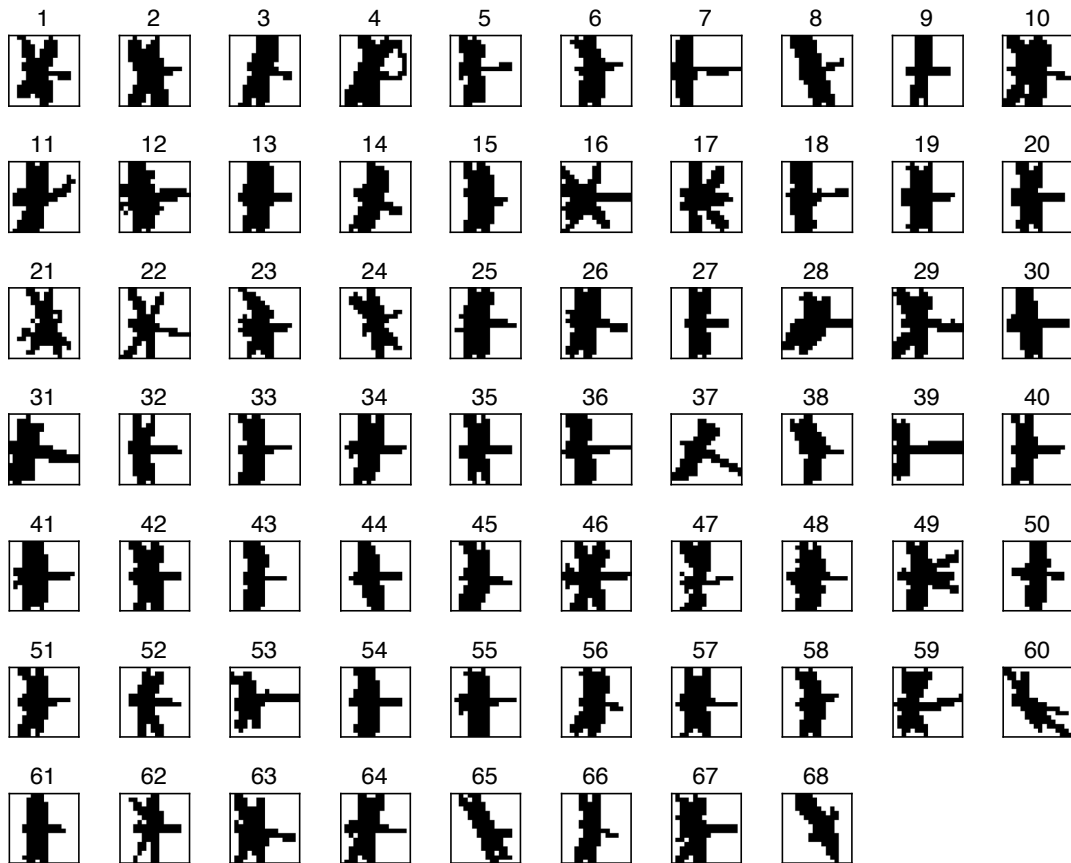

**Figure S3** Dragonfly class images from the CalTech 101 Silhouettes database<sup>1</sup>.

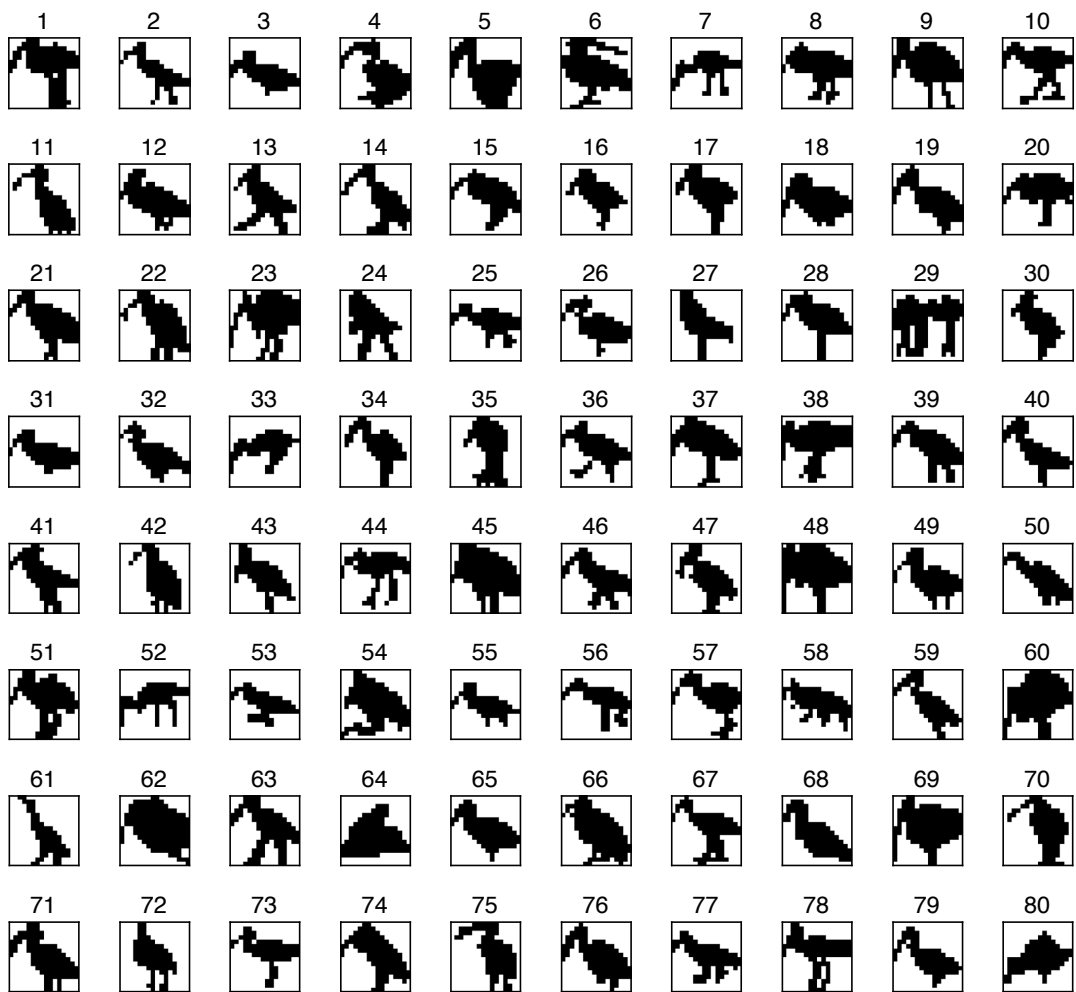

Figure S4 Ibis class images from the CalTech 101 Silhouettes database<sup>1</sup>.

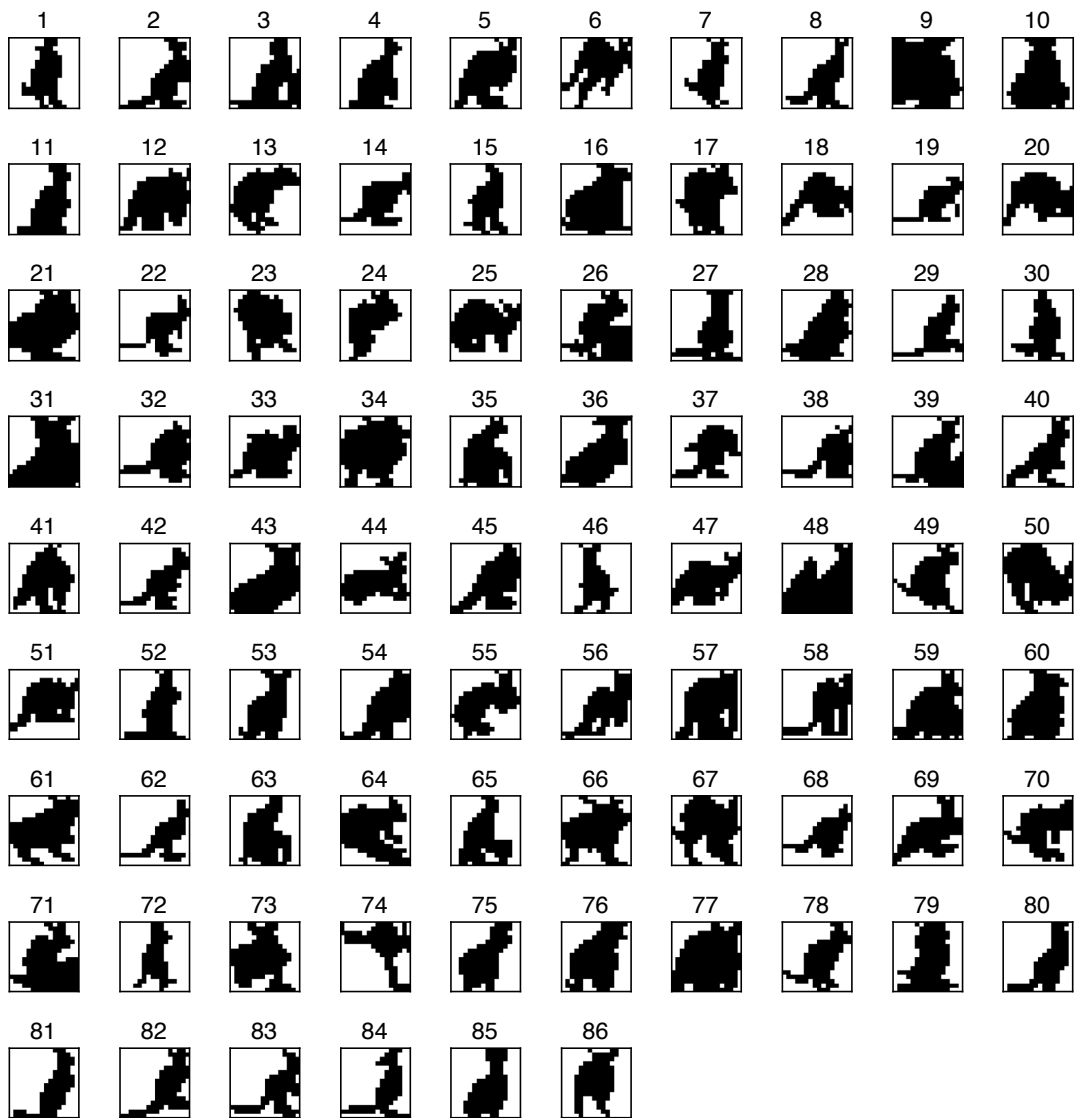

Figure S5 Kangaroo class images from the CalTech 101 Silhouettes database<sup>1</sup>.

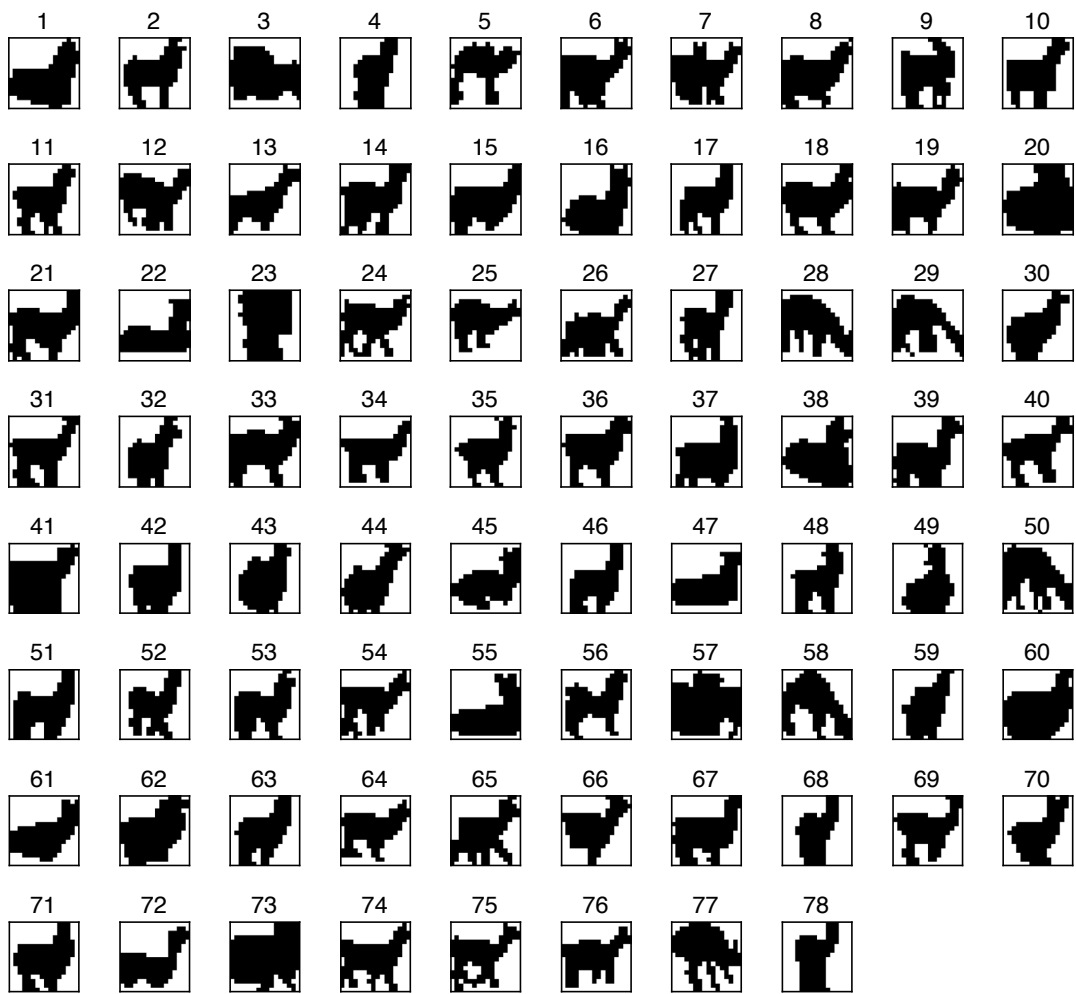

Figure S6 Llama class images from the CalTech 101 Silhouettes database<sup>1</sup>.



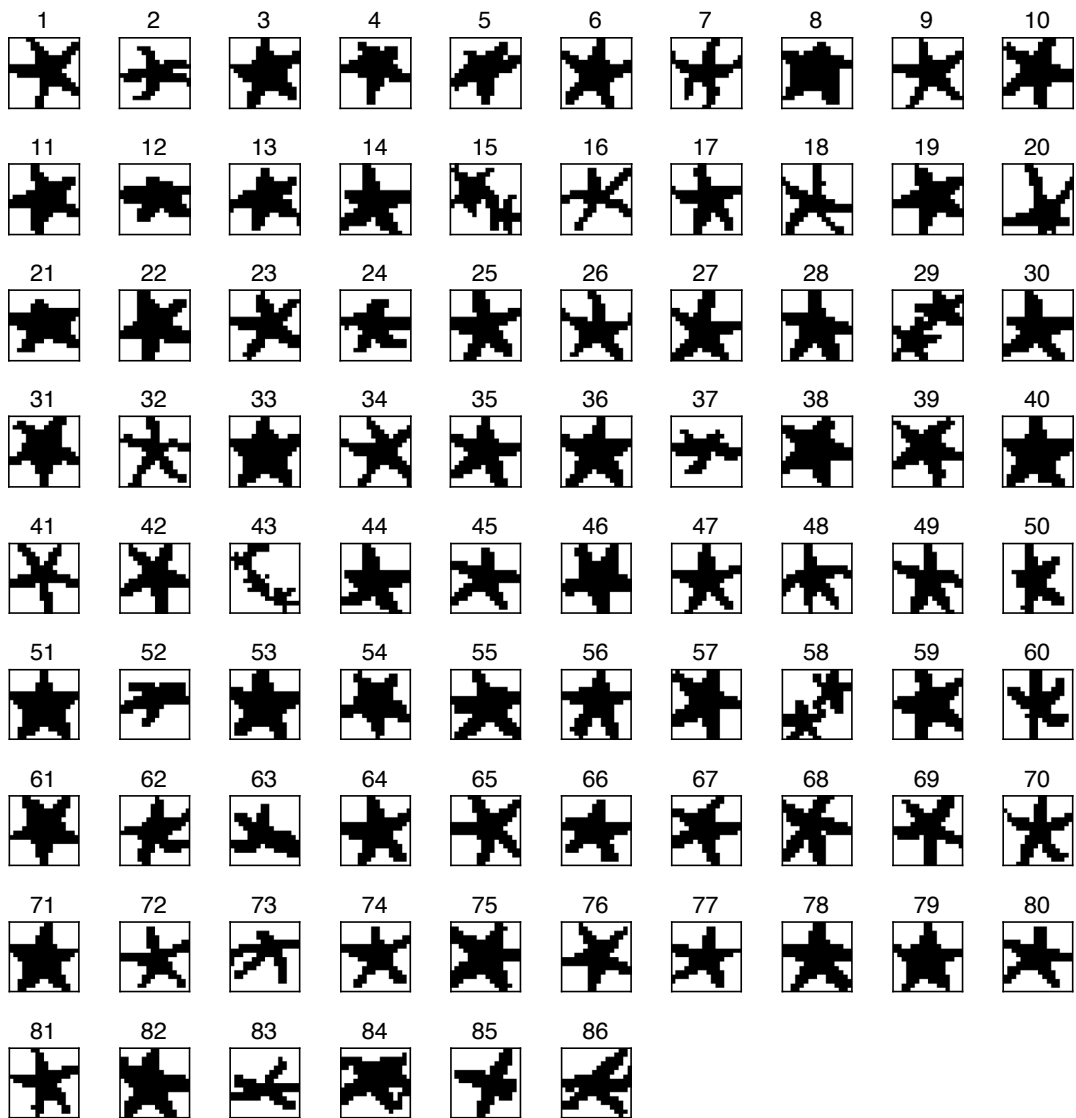

Figure S7 Starfish class images from the CalTech 101 Silhouettes database<sup>1</sup>.

## 4 Classifier Training

The winner-take-all network in the main text was trained using gradient descent. Data from the 5 considered classes was split 70:30 into training (279 images) and test (119 images) sets. The objective function,  $F$  (defined in the main text), was minimized over 700 descent epochs using a learning rate of  $5 \times 10^{-4}$ . Since the partial derivatives of the objective,  $\frac{\partial F}{\partial w_{kn}}$  (also defined in the main text), are dependent only on class-specific terms, the weight vectors for each class were updated separately during gradient descent. The exact MATLAB function used to tune the classifier weights is presented in Listing S1 (also see Section 1). After each epoch, the objective function was evaluated and its change between epochs was used to monitor training progress (see Figure S8a). The diminishing change in objective value towards the end of the training indicated a local minimum had been successfully reached (see Figure S8b). To assess classifier performance, all images from the considered classes were labeled by the trained network. A comparison between these predictions and the known true labels is shown in Figure S9. Ultimately, the network was found to have correctly classified 81.16% of all the data.

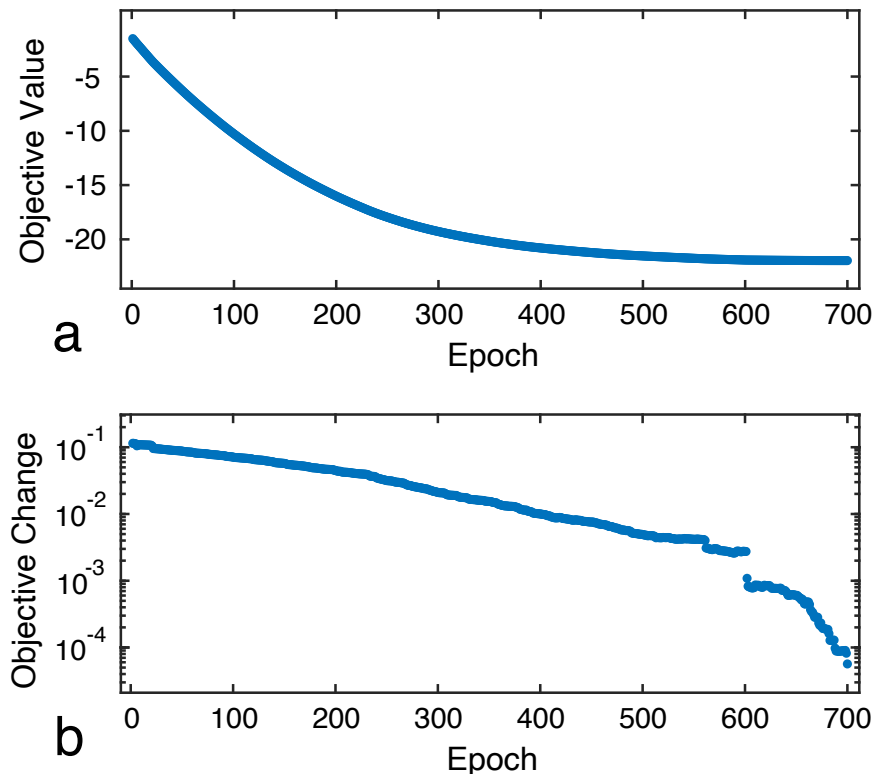

**Figure S8** Training progress updates for the network shown in the main text. **a** Objective value ( $F_e$ ) after each training epoch ( $e$ ), as evaluated on the test set. **b** Absolute changes in objective value ( $|F_e - F_{e-1}|$ ) over the course of training. The test set was composed of  $Q = 119$  held out images (30% of the available data). Training was performed over the course of 700 epochs using a learning rate of  $5 \times 10^{-4}$ .

|            |           | Predicted Class |      |          |       |          |           |
|------------|-----------|-----------------|------|----------|-------|----------|-----------|
|            |           | Dragonfly       | Ibis | Kangaroo | Llama | Starfish |           |
| True Class | Dragonfly | 64              | 4    | 5        | 5     | 0        | Dragonfly |
|            | Ibis      | 3               | 74   | 5        | 4     | 0        | Ibis      |
|            | Kangaroo  | 1               | 9    | 70       | 0     | 0        | Kangaroo  |
|            | Llama     | 9               | 12   | 1        | 63    | 1        | Llama     |
|            | Starfish  | 1               | 9    | 4        | 2     | 52       | Starfish  |

**Figure S9** Simulated confusion matrix for the network shown in the main text. The values in the cells represent the number of images from each known class (row) that were labeled by each predicted class (column). The predicted class of each image was determined by the reaction well with the shortest simulated time to transition. Data from both the training and test sets was used to generate this matrix. Overall, classes were assigned with 81.16% accuracy.

**Listing S1** Network training function, as implemented in MATLAB.

```

1 function [w,performance ,training ,testing] = trainer(x,y,w0,alpha ,epoch ,
    fraction ,seed ,verbose)
2 %%%%%%%%%%%%%%%%%%%%%%%%%%%%%%%%%%%%%%%%%%%%%%%%%%%%%%%%%%%%%%%%%%%%%%%%%%
3 % Train Winner-Take-All (WTA) Network
4 %
5 % Inputs:
6 %   x – training data (matrix with columns of training vectors) [Nf,Ne]
7 %   y – class labels (matrix with columns of training vectors) [1,Ne] (use
    integers 1,2,...)
8 %   w0 – the initial weight matrix [Nf,Nc]
9 %   alpha – the learning rate (for gradient descent)
10 %   epoch – the number of epochs
11 %   seed – seed used for random shuffling of training data (leave as [] if you
    do not wish to specify)
12 %   fraction – fraction of the total number of examples to use for training
13 %   verbose – boolean enabling detailed command line messages
14 %
15 % Outputs:
16 %   w – the final weight vector
17 %   performance – test performance (objective value) after each epoch
18 %   training – the indices of training data (numbered with respect to the
    output x and y)
19 %   testing – the indices of testing data (numbered with respect to the output
    x and y)
20 %
21 %%%%%%%%%%%%%%%%%%%%%%%%%%%%%%%%%%%%%%%%%%%%%%%%%%%%%%%%%%%%%%%%%%%%%%%%%%
22
23 % initialize weights
24 w = w0;
25 clear w0
26
27 % get shape of inputs
28 % * Nf = number of features
29 % * Ne = number of examples (for training , test , or validation)
30 % * Nc = number of classes
31 [Nf,Ne] = size(x); % [Nf,Ne]
32 [~,Ne2] = size(y); % [1,Ne]
33 [Nf2,Nc] = size(w); % [Nf,Nc]
34 yUniq = unique(y);
35 Nc2 = length(yUniq);
36 if Ne~=Ne2 || Nf~=Nf2 || Nc~=Nc2
37     error('Input data sizes are invalid.')
```

```

46     shuff.seed = seed;
47 end
48 shuff.perm = randperm(Ne);
49 x = x(:, shuff.perm);
50 y = y(shuff.perm);
51
52 % normalize the weights and training data
53 for c = 1:Nc
54     w(:, c) = w(:, c) ./ (norm(w(:, c)));
55 end
56 xnorm = ones(size(x(1, :)));
57 for e = 1:Ne
58     xnorm(e) = norm(x(:, e));
59     x(:, e) = x(:, e) ./ xnorm(e);
60 end
61
62 % split data into testing and training sets
63 all = 1:Ne;
64 training = randperm(round(Ne*fraction));
65 testing = all;
66 % if there are examples left for testing
67 if length(training)~=length(all)
68     testing(training) = [];
69 else
70     % otherwise reuse training examples for testing (not advised)
71 end
72
73 % perform optimization of weights
74 sqrdL2diff = @(x,w) sum((w-x).^2); % squared L-2 norm of the difference
75 performance = zeros([epoch, length(testing)]); % track over all epochs
76 perfMeanCurr = 0;
77 % loop over each epoch
78 for n = 1:epoch
79     % loop over each train example
80     for e = training
81         % find optimal weights for each class
82         for c=1:Nc
83             % perform gradient descent
84             if yUniq(c)==y(e)
85                 gradient = -2*(w(:, c)-x(:, e));
86             else
87                 gradient = (2/(Nc-1))*(w(:, c)-x(:, e));
88             end
89             w(:, c) = w(:, c) + alpha*gradient;
90
91             % normalize weights to max
92             w(:, c) = w(:, c) ./ (max(abs(w(:, c)))));
93
94             % clip off negative weights
95             w(w(:, c)<0,c) = 0;
96         end
97     end

```

```

98     counter = 1;
99     % loop over each test example
100    for e = testing
101        % loop over each class
102        xTest = xnorm(e)*x(:,e);
103        for c=1:Nc
104            % evaluate the portion of the objective function related to
105            % the current class
106            if yUniq(c)==y(e)
107                factor = +1;
108            else % yUniq(cc)==y(e)
109                factor = -1/(Nc-1);
110            end
111            performance(n, counter) = performance(n, counter) + factor*
112            sqrdL2diff(xTest,w(:,c));
113        end
114        counter = counter + 1;
115    end
116    perfMeanLast = perfMeanCurr;
117    perfMeanCurr = mean(performance(n,:));
118    if verbose
119        disp(['iteration: ' num2str(n) ', mean performance: ' sprintf('%0.4e',
120        perfMeanCurr) ', change: ' sprintf('%0.4e',perfMeanCurr-
121        perfMeanLast)]);
122    end
123    end
124    % reference indices to the original data
125    training = shuff.perm(training);
126    testing = shuff.perm(testing);
127    end

```

## 5 Simulating Many 5-Class Networks

The winner-take-all network presented in the main text used a manually chosen subset of image classes from the the CalTech 101 Silhouettes dataset<sup>1</sup>. To see how similar networks would perform if the classes were randomly selected, we trained and simulated 100 such classifiers, each with their own unique set of 5 object classes. The results are summarized in Figure S10 and Table S1. Despite the known class degeneracies present in this dataset (see Section 3) and the simple network topology, the majority of classifiers perform significantly better than random guessing.

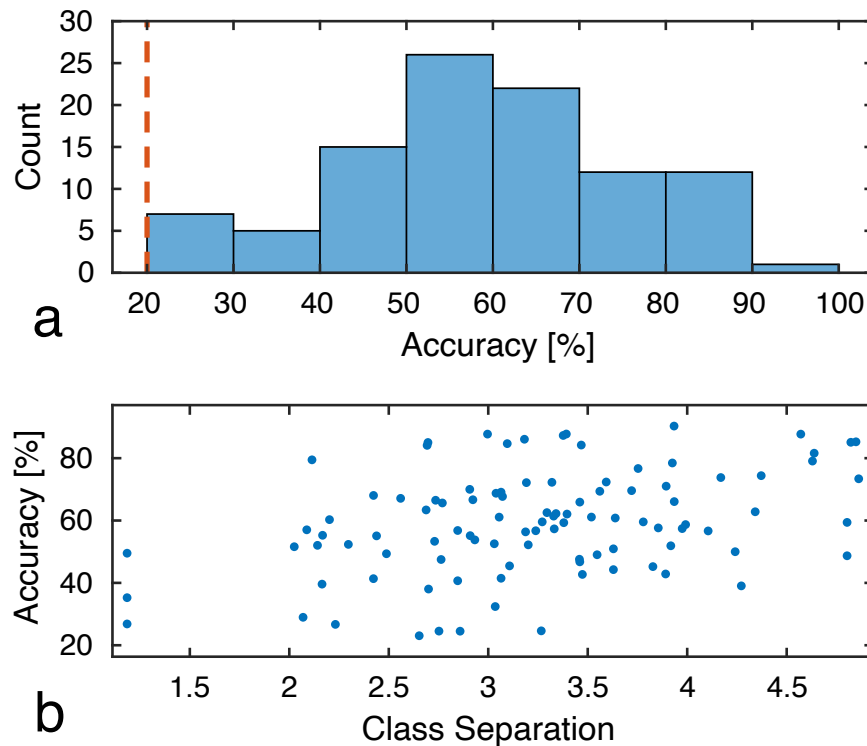

**Figure S10** Overall classification accuracy across all 100 simulated 5-class networks. **a** A histogram of the classification accuracies observed across both the training and test sets (those shown in b). The dashed orange line represents the probability of randomly guessing the correct image class ( $\frac{1}{5} = 20\%$ ). **b** Classification accuracies of the simulated networks plotted against their ensemble class separations, the minimal Euclidean distance between class averages (see Figure S2). There is a moderate positive correlation (Pearson coefficient of 0.39) between accuracy and class separation. Each network was randomly assigned a unique set of 5 image classes to learn (see Table S1) and was trained over 700 epochs with a learning rate of  $5 \times 10^{-4}$ .

**Table S1** A summary of classification performance across all 100 of the simulated networks. The training, test, and overall classification accuracies are shown for each network, along with a list of the 5 associated classes and their ensemble class separation (Sep.).

| #  | Overall | Train  | Test   | Sep. | Classes                                                            |
|----|---------|--------|--------|------|--------------------------------------------------------------------|
| 1  | 72.16%  | 73.96% | 67.96% | 3.19 | Faces 3, windsor chair, euphonium, helicopter, brontosaurus        |
| 2  | 66.07%  | 65.23% | 68.04% | 3.93 | rooster, scorpion, Faces 2, ketch, tick                            |
| 3  | 67.71%  | 66.82% | 69.79% | 3.07 | butterfly, beaver, barrel, nautilus, revolver                      |
| 4  | 52.21%  | 56.32% | 42.68% | 3.20 | ant, butterfly, cannon, scissors, pyramid                          |
| 5  | 59.57%  | 54.55% | 71.43% | 3.27 | elephant, gerenuk, strawberry, wild cat, dragonfly                 |
| 6  | 41.36%  | 42.73% | 38.17% | 2.42 | watch, scorpion, Leopards, ceiling fan, pizza                      |
| 7  | 85.25%  | 88.24% | 78.26% | 4.85 | ketch, car side, trilobite, mayfly, brain                          |
| 8  | 46.75%  | 50.62% | 37.68% | 3.46 | windsor chair, metronome, accordion, cup, garfield                 |
| 9  | 84.11%  | 84.09% | 84.15% | 2.69 | Airplanes Side 2, minaret, water lilly, kangaroo, brain            |
| 10 | 65.63%  | 64.84% | 67.49% | 2.77 | bonsai, Faces 2, stapler, metronome, panda                         |
| 11 | 79.07%  | 79.06% | 79.10% | 4.63 | anchor, saxophone, Faces 2, butterfly, lamp                        |
| 12 | 87.71%  | 86.76% | 89.93% | 4.57 | brontosaurus, water lilly, windsor chair, Motorbikes 16, cellphone |
| 13 | 39.60%  | 36.00% | 48.00% | 2.16 | elephant, crocodile, cannon, cougar body, beaver                   |
| 14 | 24.53%  | 26.11% | 20.83% | 2.75 | brain, Leopards, scorpion, garfield, dolphin                       |
| 15 | 24.51%  | 24.86% | 23.68% | 2.86 | sunflower, platypus, yin yang, lobster, gerenuk                    |
| 16 | 62.08%  | 63.64% | 58.45% | 3.40 | ewer, ibis, cougar face, Leopards, mayfly                          |
| 17 | 71.02%  | 72.73% | 67.02% | 3.89 | minaret, ibis, barrel, brontosaurus, crayfish                      |
| 18 | 57.02%  | 59.06% | 52.29% | 2.09 | ketch, ferry, gerenuk, hedgehog, brain                             |
| 19 | 26.69%  | 24.73% | 31.25% | 2.23 | flamingo head, lobster, ferry, emu, soccer ball                    |
| 20 | 90.29%  | 89.27% | 92.70% | 3.93 | trilobite, Motorbikes 16, buddha, mandolin, scissors               |
| 21 | 79.47%  | 78.97% | 80.63% | 2.11 | Leopards, wild cat, revolver, Airplanes Side 2, accordion          |
| 22 | 52.55%  | 55.31% | 46.05% | 3.03 | pagoda, buddha, beaver, platypus, dollar bill                      |
| 23 | 67.11%  | 67.94% | 65.17% | 2.56 | chandelier, beaver, water lilly, wheelchair, rooster               |
| 24 | 66.50%  | 67.71% | 63.71% | 2.74 | ibis, umbrella, menorah, starfish, scorpion                        |
| 25 | 39.04%  | 37.25% | 43.18% | 4.27 | soccer ball, panda, trilobite, crab, inline skate                  |
| 26 | 28.96%  | 27.83% | 31.63% | 2.07 | umbrella, platypus, hawksbill, strawberry, sunflower               |
| 27 | 53.79%  | 58.62% | 42.53% | 2.93 | garfield, rhino, trilobite, cougar body, euphonium                 |
| 28 | 56.37%  | 59.09% | 50.00% | 3.19 | brain, ferry, pyramid, pigeon, gramophone                          |

Table continues on the next page.



| #  | Overall | Train  | Test   | Sep. | Classes                                                  |
|----|---------|--------|--------|------|----------------------------------------------------------|
| 29 | 60.29%  | 61.86% | 56.63% | 2.20 | ceiling fan, schooner, pyramid, umbrella, octopus        |
| 30 | 55.27%  | 54.83% | 56.29% | 2.17 | hedgehog, watch, crocodile, pyramid, chandelier          |
| 31 | 85.10%  | 87.67% | 79.03% | 4.82 | inline skate, stapler, saxophone, rooster, brontosaurus  |
| 32 | 41.49%  | 41.59% | 41.24% | 3.06 | joshua tree, menorah, hedgehog, cup, stop sign           |
| 33 | 65.91%  | 67.03% | 63.29% | 3.46 | metronome, anchor, garfield, crayfish, kangaroo          |
| 34 | 84.21%  | 84.56% | 83.38% | 3.47 | beaver, Motorbikes 16, stapler, ketch, ibis              |
| 35 | 78.46%  | 78.37% | 78.68% | 3.93 | revolver, cougar face, watch, scissors, binocular        |
| 36 | 56.80%  | 57.81% | 54.46% | 2.85 | buddha, sunflower, crocodile head, euphonium, bass       |
| 37 | 59.57%  | 59.79% | 59.04% | 3.78 | ferry, emu, hedgehog, okapi, dragonfly                   |
| 38 | 40.68%  | 40.76% | 40.51% | 2.85 | euphonium, snoopy, pizza, sea horse, bass                |
| 39 | 59.31%  | 60.55% | 56.41% | 3.38 | watch, euphonium, menorah, octopus, hawkbill             |
| 40 | 50.00%  | 47.03% | 56.98% | 4.24 | saxophone, dollar bill, brontosaurus, grand piano, ferry |
| 41 | 58.70%  | 58.80% | 58.47% | 3.99 | metronome, soccer ball, Leopards, Faces 2, windsor chair |
| 42 | 24.62%  | 23.08% | 28.21% | 3.27 | pizza, beaver, windsor chair, yin yang, flamingo head    |
| 43 | 44.26%  | 44.93% | 42.70% | 3.63 | stop sign, cup, snoopy, barrel, brain                    |
| 44 | 26.83%  | 26.87% | 26.74% | 1.18 | pagoda, soccer ball, pizza, stop sign, wheelchair        |
| 45 | 61.11%  | 58.94% | 66.15% | 3.52 | saxophone, anchor, lobster, scissors, hedgehog           |
| 46 | 49.35%  | 49.07% | 50.00% | 2.49 | laptop, helicopter, metronome, ferry, ceiling fan        |
| 47 | 60.81%  | 61.32% | 59.62% | 3.64 | chandelier, dollar bill, binocular, menorah, laptop      |
| 48 | 87.72%  | 87.71% | 87.76% | 3.00 | octopus, saxophone, Airplanes Side 2, tick, inline skate |
| 49 | 61.09%  | 64.88% | 52.27% | 3.05 | schooner, hedgehog, llama, wild cat, joshua tree         |
| 50 | 48.70%  | 51.06% | 43.21% | 4.80 | saxophone, scissors, schooner, yin yang, cougar face     |
| 51 | 51.90%  | 49.22% | 58.18% | 3.92 | soccer ball, starfish, laptop, elephant, minaret         |
| 52 | 69.38%  | 68.10% | 72.36% | 3.56 | platypus, ewer, Faces 2, flamingo, anchor                |
| 53 | 68.05%  | 68.99% | 65.85% | 2.42 | grand piano, mandolin, minaret, bonsai, joshua tree      |
| 54 | 85.03%  | 85.88% | 83.05% | 2.70 | stegosaurus, Motorbikes 16, metronome, bass, scissors    |
| 55 | 56.73%  | 59.41% | 50.49% | 3.24 | bonsai, dolphin, chair, rooster, panda                   |
| 56 | 57.42%  | 56.22% | 60.22% | 3.97 | laptop, pigeon, chandelier, headphone, wrench            |
| 57 | 52.35%  | 53.11% | 50.56% | 2.30 | crocodile head, crab, dolphin, crocodile, cellphone      |
| 58 | 69.59%  | 71.76% | 64.55% | 3.72 | ketch, windsor chair, crocodile head, llama, lotus       |
| 59 | 52.04%  | 53.37% | 48.92% | 2.14 | lotus, rhino, llama, chair, Leopards                     |
| 60 | 47.59%  | 47.78% | 47.13% | 3.46 | pyramid, wheelchair, ant, elephant, dragonfly            |

Table continues on the next page.

| #  | Overall | Train  | Test   | Sep. | Classes                                                       |
|----|---------|--------|--------|------|---------------------------------------------------------------|
| 61 | 23.05%  | 22.71% | 23.86% | 2.65 | accordion, helicopter, stapler, soccer ball, cannon           |
| 62 | 87.75%  | 86.78% | 90.03% | 3.39 | cup, laptop, binocular, Airplanes Side 2, umbrella            |
| 63 | 49.03%  | 51.67% | 42.86% | 3.55 | mandolin, camera, stapler, tick, crab                         |
| 64 | 81.60%  | 80.26% | 84.69% | 4.64 | cellphone, schooner, electric guitar, butterfly, wrench       |
| 65 | 70.00%  | 70.41% | 69.05% | 2.91 | scorpion, dolphin, laptop, Faces 2, panda                     |
| 66 | 50.93%  | 53.74% | 44.33% | 3.63 | yin yang, cup, cellphone, emu, brain                          |
| 67 | 61.42%  | 61.80% | 60.53% | 3.33 | headphone, camera, pyramid, tick, wheelchair                  |
| 68 | 76.69%  | 77.63% | 74.49% | 3.75 | kangaroo, sea horse, dragonfly, ibis, strawberry              |
| 69 | 72.36%  | 72.44% | 72.16% | 3.59 | stegosaurus, saxophone, grand piano, revolver, ant            |
| 70 | 57.63%  | 58.47% | 55.70% | 3.85 | cougar face, wheelchair, saxophone, emu, brontosaurus         |
| 71 | 32.41%  | 33.99% | 28.74% | 3.04 | joshua tree, crab, cup, wrench, lamp                          |
| 72 | 55.08%  | 55.14% | 54.95% | 2.44 | emu, joshua tree, crayfish, barrel, crab                      |
| 73 | 42.86%  | 43.98% | 40.24% | 3.89 | laptop, strawberry, cougar body, chair, gramophone            |
| 74 | 51.60%  | 54.31% | 45.24% | 2.02 | crayfish, panda, buddha, lobster, ceiling fan                 |
| 75 | 73.39%  | 74.11% | 71.71% | 4.86 | ibis, wrench, ferry, dragonfly, Faces 2                       |
| 76 | 42.72%  | 42.13% | 44.09% | 3.47 | pizza, flamingo head, panda, menorah, starfish                |
| 77 | 49.52%  | 49.54% | 49.46% | 1.18 | soccer ball, dollar bill, chair, laptop, stop sign            |
| 78 | 35.25%  | 36.71% | 31.82% | 1.18 | ferry, stop sign, crayfish, soccer ball, wild cat             |
| 79 | 74.39%  | 76.73% | 68.97% | 4.37 | inline skate, headphone, umbrella, chandelier, platypus       |
| 80 | 55.15%  | 57.58% | 49.49% | 2.91 | nautilus, car side, tick, okapi, joshua tree                  |
| 81 | 72.26%  | 74.51% | 67.05% | 3.32 | llama, metronome, kangaroo, saxophone, windsor chair          |
| 82 | 45.22%  | 48.42% | 37.80% | 3.83 | helicopter, cougar face, gerenuk, metronome, crocodile head   |
| 83 | 53.33%  | 52.51% | 55.26% | 2.73 | octopus, stapler, minaret, cellphone, saxophone               |
| 84 | 56.67%  | 62.50% | 43.06% | 4.11 | platypus, panda, nautilus, llama, snoopy                      |
| 85 | 45.45%  | 46.95% | 41.96% | 3.11 | grand piano, car side, water lilly, crocodile head, stop sign |
| 86 | 69.10%  | 71.67% | 63.11% | 3.06 | windsor chair, crocodile head, buddha, menorah, joshua tree   |
| 87 | 57.33%  | 58.14% | 55.43% | 3.33 | scorpion, cougar face, inline skate, wheelchair, dalmatian    |
| 88 | 68.75%  | 69.86% | 66.13% | 3.04 | binocular, windsor chair, inline skate, strawberry, cup       |
| 89 | 73.79%  | 75.93% | 68.82% | 4.17 | rhino, accordion, electric guitar, wheelchair, lamp           |
| 90 | 62.23%  | 61.50% | 63.92% | 3.34 | wheelchair, llama, lotus, cougar face, pizza                  |
| 91 | 38.03%  | 38.93% | 35.94% | 2.70 | crocodile, ceiling fan, snoopy, wild cat, camera              |
| 92 | 87.29%  | 89.02% | 83.23% | 3.38 | Motorbikes 16, cup, panda, trilobite, laptop                  |

Table continues on the next page.

| #   | Overall | Train  | Test   | Sep. | Classes                                                  |
|-----|---------|--------|--------|------|----------------------------------------------------------|
| 93  | 59.40%  | 60.37% | 57.14% | 4.80 | hedgehog, schooner, scissors, saxophone, wrench          |
| 94  | 63.40%  | 62.31% | 65.94% | 2.69 | wrench, cougar face, emu, lotus, watch                   |
| 95  | 86.07%  | 88.05% | 81.48% | 3.18 | electric guitar, windsor chair, ketch, platypus, ibis    |
| 96  | 47.50%  | 47.77% | 46.88% | 2.76 | cougar face, rooster, butterfly, bass, rhino             |
| 97  | 62.81%  | 64.46% | 58.97% | 4.34 | electric guitar, watch, sea horse, menorah, dolphin      |
| 98  | 62.54%  | 63.27% | 60.82% | 3.29 | hedgehog, pyramid, gramophone, cougar body, ketch        |
| 99  | 66.67%  | 67.31% | 65.15% | 2.92 | electric guitar, bass, pigeon, Leopards, flamingo        |
| 100 | 84.67%  | 86.05% | 81.43% | 3.10 | Motorbikes 16, crab, crocodile head, garfield, dragonfly |

## 6 Simulating a 9-Class Network

To demonstrate that an autocatalytic winner-take-all network can be successfully applied to more difficult classification tasks, we trained one such network over 900 epochs on the following 9 classes from the Caltech 101 Silhouettes database<sup>1</sup>: revolver, lamp, mandolin, headphone, umbrella, helicopter, pyramid, chair, saxophone. The learned weights are shown in Figure S11. These weights were used to classify all images associated with the 9 considered classes. The resulting confusion matrix is shown in Figure S12, and the overall classification accuracy was 80.00%.

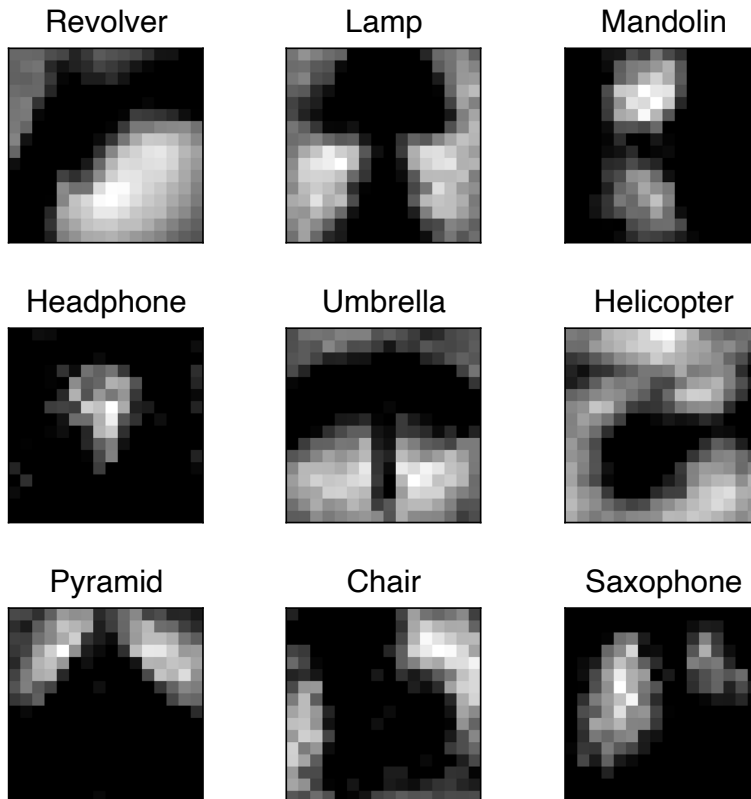

**Figure S11** Classifier weights for the 9-class network. Weights were learned over the course of 900 gradient descent epochs with a learning rate of  $5 \times 10^{-4}$ .

|            |            | Predicted Class |            |      |          |         |          |           |          |    |            |
|------------|------------|-----------------|------------|------|----------|---------|----------|-----------|----------|----|------------|
| True Class | chair      | 21              | 1          | 2    | 0        | 0       | 0        | 16        | 0        | 0  | chair      |
|            | headphone  | 0               | 52         | 1    | 0        | 0       | 0        | 4         | 4        | 0  | headphone  |
|            | helicopter | 0               | 0          | 57   | 0        | 0       | 0        | 0         | 0        | 0  | helicopter |
|            | lamp       | 1               | 3          | 3    | 16       | 1       | 0        | 17        | 1        | 0  | lamp       |
|            | mandolin   | 1               | 4          | 17   | 0        | 46      | 2        | 16        | 2        | 0  | mandolin   |
|            | pyramid    | 0               | 0          | 0    | 0        | 0       | 81       | 0         | 1        | 0  | pyramid    |
|            | revolver   | 0               | 0          | 0    | 0        | 0       | 1        | 60        | 1        | 0  | revolver   |
|            | saxophone  | 0               | 10         | 1    | 0        | 0       | 0        | 0         | 64       | 0  | saxophone  |
|            | umbrella   | 0               | 0          | 0    | 0        | 0       | 0        | 0         | 0        | 43 | umbrella   |
|            | chair      | headphone       | helicopter | lamp | mandolin | pyramid | revolver | saxophone | umbrella |    |            |

**Figure S12** Classification confusion matrix for the 9-class network. Images from both the training and test sets were included. Overall, classes were assigned with 80.00% accuracy.

## Notes and references

- [1] B. Marlin, K. Swersky, B. Chen and N. Freitas, Proceedings of the Thirteenth International Conference on Artificial Intelligence and Statistics, Chia Laguna Resort, Sardinia, Italy, 2010, pp. 509–516.
- [2] L. Fei-Fei, R. Fergus and P. Perona, *IEEE Transactions on Pattern Analysis and Machine Intelligence*, 2006, **28**, 594–611.
